# Supplementary material for: African Swine Fever Virus I267L Is a Hemorrhage-Related Gene Based on Transcriptome Analysis
Source: MDPI journal article supplement (doi:10.3390/microorganisms12020400), 2024-02-17
Supplement: s1 [file s1]

# African Swine Fever Virus I267L Is a Hemorrhage-Related Gene Based on Transcriptome Analysis

Yuan Wen, Xianghan Duan, Jingjing Ren, Jing Zhang, Guiquan Guan, Yi Ru, Dan Li and Haixue Zheng

**Table S1.** Fold Changes of DEGs appeared at both 18 hpi and 36 hpi ( $\Delta$ I267L- vs. ASFV-infected PAMs).

| (ΔI267L- vs. ASFV- infected PAMs) |       |       |
|-----------------------------------|-------|-------|
| Gene name                         | 18hpi | 36hpi |
| F3                                | 40    | 27    |
| COL1A2                            | 9.3   | 8     |
| SLC6A4                            | 7.2   | 7.6   |
| DDIT4L                            | 6.4   | 5.3   |
| AMCF-II                           | 2.1   | 7     |
| SLCO3A1                           | 3.8   | 3.6   |
| CISH                              | 3.3   | 4     |
| IL22RA2                           | 3     | 4.2   |
| IL1R1                             | 2.3   | 4.6   |
| LOC296866                         | 3.6   | 3     |
| B3GNT5                            | 2.    | 3.3   |
| LOC100153783                      | 2.3   | 2.8   |
| UPP1                              | 2.3   | 2.5   |
| BCL6                              | 0.42  | 0.34  |
| C3                                | 0.36  | 0.29  |
| NUAK1                             | 0.42  | 0.17  |

**Table S2.** Fold Change values of three major inflammation cytokines.

| Gene name  | ASFV vs MOCK     |         | ΔI267L vs MOCK   |         |
|------------|------------------|---------|------------------|---------|
|            | Foldchange value | Q value | Foldchange value | Q value |
| TNF (18h)  | 0.47             | 1       | 0.38             | 1       |
| IL1B (18h) | 4.64             | 1       | 2.24             | 1       |
| IL-6 (18h) | Not identified   | NA      | 776              | 1       |
| TNF (36h)  | 0.97             | 1       | 1.34             | 1       |
| IL1B (36h) | 3.9              | 1       | 11               | 0.016   |
| IL-6 (36h) | Not identified   | NA      | Not identified   | NA      |

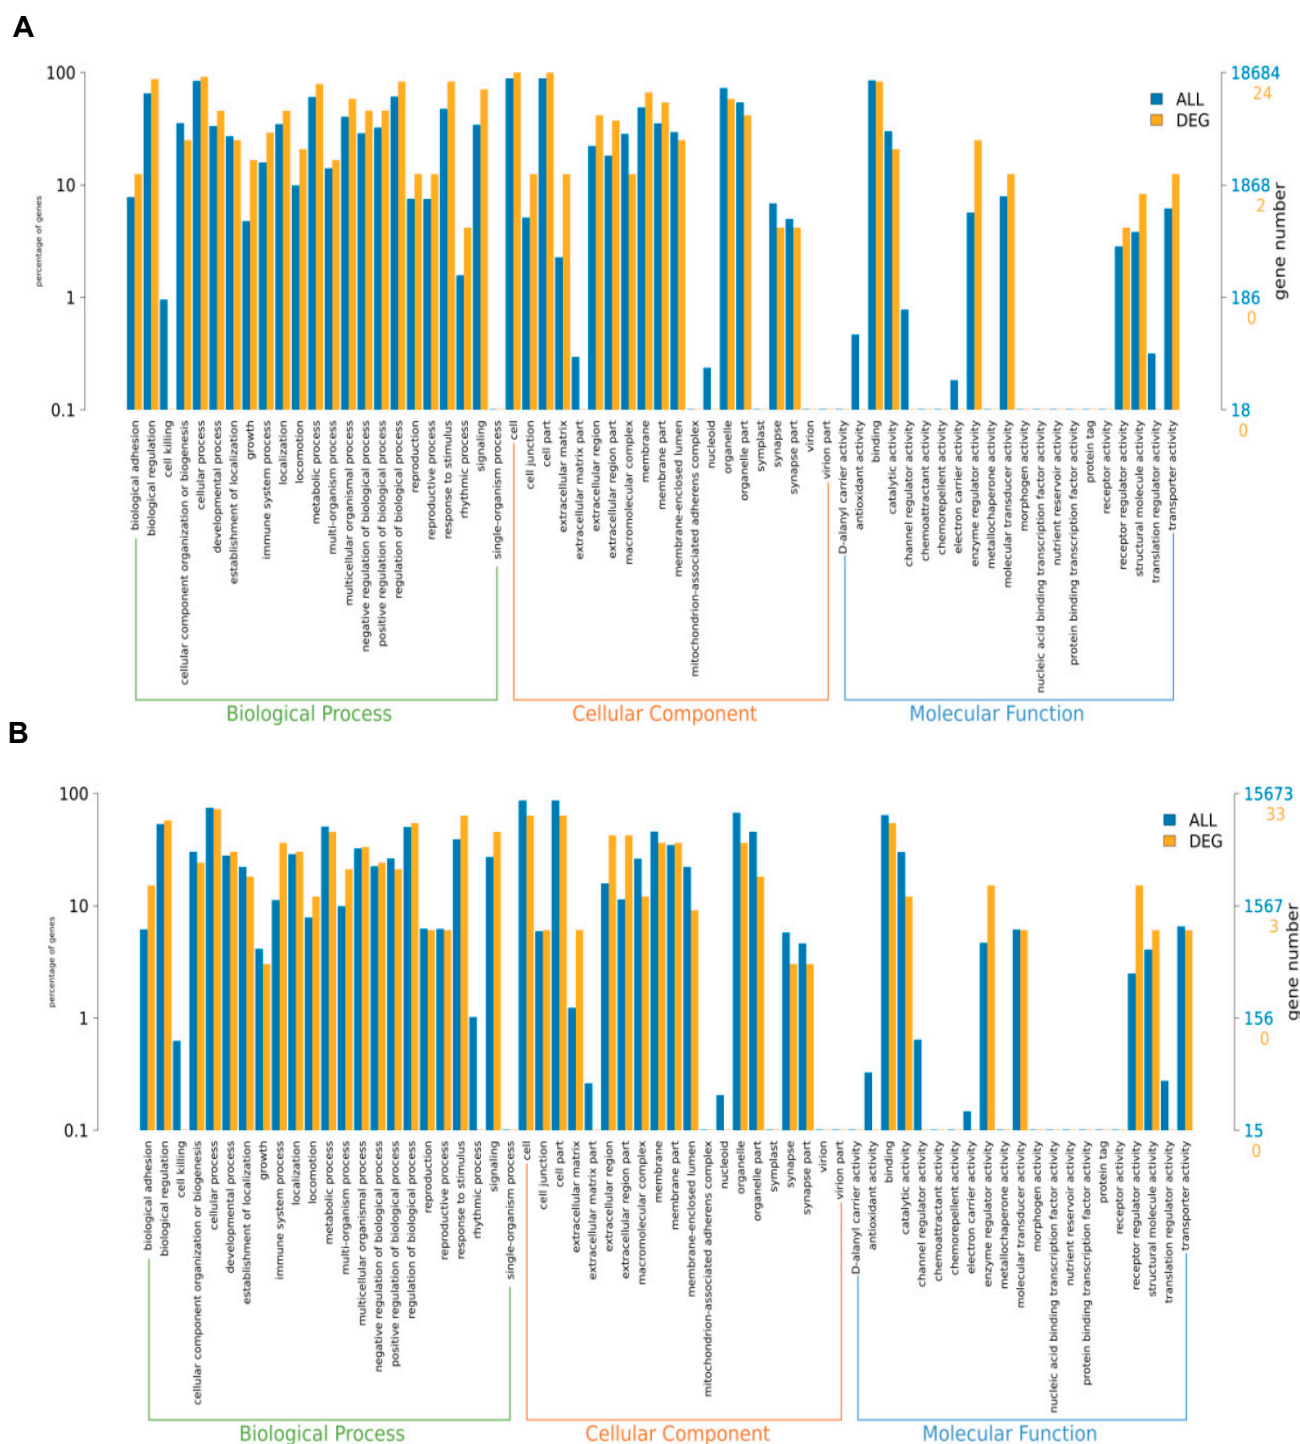

**A**

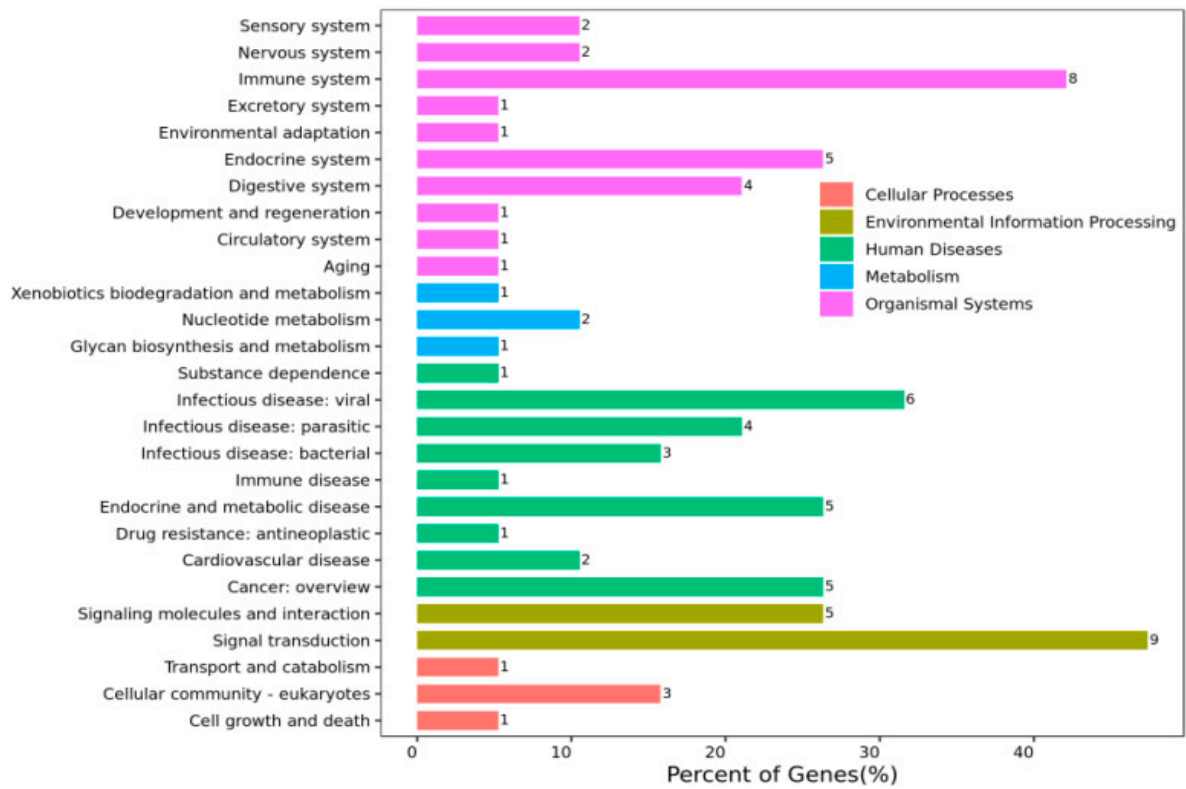

**B**

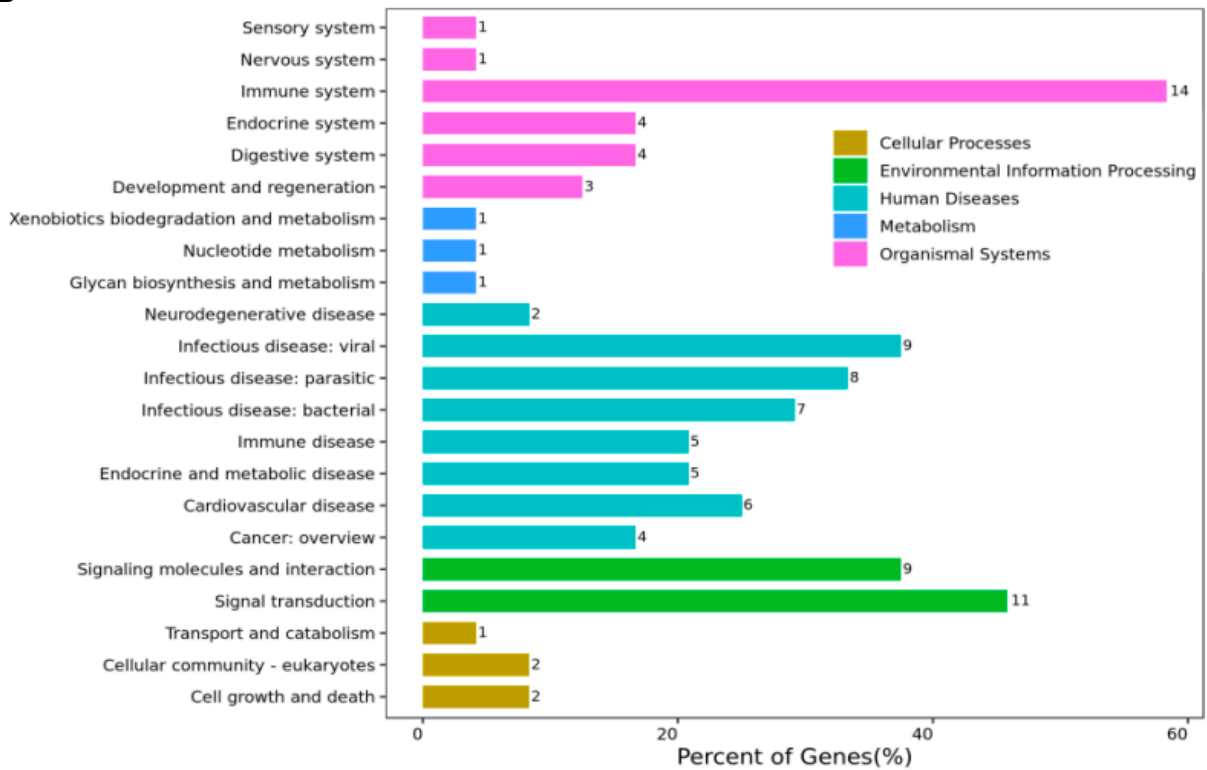

**Figure S2.** KEGG analysis for the distribution of the DEGs. **(A)** Distribution of DEGs for  $\Delta$ I267L-infected PAMs vs. ASFV- infected PAMs at 18 hpi. **(B)** Distribution of DEGs for  $\Delta$ I267L- infected PAMs vs. ASFV- infected PAMs at 36 hpi.
